# Supplementary material for: Differences in arithmetic performance between Chinese and German adults are accompanied by differences in processing of non-symbolic numerical magnitude
Source: PLoS One. 2017 Apr 6;12(4):e0174991. doi: 10.1371/journal.pone.0174991 (PMC5383159; doi:10.1371/journal.pone.0174991)
Supplement: S1 Table — (XLSX) [file pone.0174991.s001.xlsx]

## Sheet: raw data
participant	sex (1=female)	age (years)	culture (1=Chinese)	ALERT_RT (msec)	ALERT_ER (%)	ARITHMETIC_RT (sec)	ARITHMETIC_ER (%)	REASONING	COMPARISON_RT (msec)	COMPARISON_ER (%)	COMPARISON_RT_luminance-controlled (msec)	COMPARISON_RT_size-controlled (msec)	COMPARISON_ER_luminance-controlled (%)	COMPARISON_ER_size-controlled (%)	COMPARISON_RT (msec)_ratio_075	COMPARISON_RT (msec)_ratio_08125	COMPARISON_RT (msec)_ratio_0875	COMPARISON_RT (msec)_ratio_09375	COMPARISON_RT (msec)_ratio_10625	COMPARISON_RT (msec)_ratio_1125	COMPARISON_RT (msec)_ratio_11875	COMPARISON_RT (msec)_ratio_125	COMPARISON_ER (%)_ratio_075	COMPARISON_ER (%)_ratio_08125	COMPARISON_ER (%)_ratio_0875	COMPARISON_ER (%)_ratio_09375	COMPARISON_ER (%)_ratio_10625	COMPARISON_ER (%)_ratio_1125	COMPARISON_ER (%)_ratio_11875	COMPARISON_ER (%)_ratio_125
1	1	18	0	393.12	0	816	0.454545	48	1989.82	10.1562	2085.7	1893.94	17.1875	3.125	1917.31	1969.7	1966.85	2198.5	2321.97	1901.44	2028.88	1673.88	6.25	6.25	12.5	31.25	18.75	6.25	0	0
2	0	20	0	#	#	1038	2.04545	43	1964.75	7.03125	2047.25	1882.26	10.9375	3.125	1725	1801.71	2252.85	2202.3	2194	2152.46	1767.81	1686.62	0	12.5	6.25	18.75	12.5	6.25	0	0
3	0	21	0	322.43	0	819	0.227273	42	1765.63	20.3125	1941.48	1589.78	25	15.625	1364.38	1674.12	1842.39	2053.7	2459.5	1775.3	1710.17	1474.42	0	0	18.75	43.75	37.5	25	12.5	25
4	1	20	0	#	#	770	1.36364	41	1760.04	14.8438	1859.65	1660.44	15.625	14.0625	1398.04	1582.92	1525.49	1896.32	2078.21	2318.79	1671.17	1632	6.25	12.5	18.75	31.25	18.75	12.5	18.75	0
5	0	20	0	#	#	608	0.454545	44	1665.06	21.875	1791	1539.12	32.8125	10.9375	1584.25	1405.54	1791.92	1825.92	1720.15	1665.31	1673.04	1803.46	0	6.25	50	25	31.25	25	18.75	18.75
6	0	24	0	278.5	0	454	0.909091	45	1655.39	19.5312	1656.1	1654.69	18.75	20.3125	1598.25	1508.65	1603.08	1815.67	1957.75	1650.83	1566.25	1665.31	0	18.75	31.25	62.5	25	18.75	0	0
7	1	21	0	277.5	0	853	0.227273	43	1562.26	17.1875	1684.3	1440.22	26.5625	7.8125	1327.12	1517.9	1598.5	1771.98	1962.64	1620.21	1517.92	1313.83	0	18.75	18.75	31.25	18.75	37.5	6.25	6.25
8	1	20	0	#	#	973	0	49	1540.29	13.2812	1675.48	1405.1	18.75	7.8125	1268	1416.31	1617.93	1841.41	1701.87	1643.21	1452.6	1588.4	0	0	18.75	31.25	18.75	12.5	18.75	6.25
9	0	20	0	382.03	0	563	1.59091	42	1539.62	21.875	1624.24	1455	28.125	15.625	1251.32	1233.58	1653.51	1749.39	1669	1674.43	1744.33	1379.8	6.25	25	18.75	31.25	37.5	12.5	25	18.75
10	0	20	0	339.5	0	788	0.681818	49	1536.84	26.5625	1612.25	1461.42	31.25	21.875	1082.09	1732.4	1686.5	1737.8	1458.96	1797.8	1775.76	1313.19	6.25	18.75	50	18.75	25	50	25	18.75
11	0	20	0	#	#	845	0.454545	37	1531.26	27.3438	1623.27	1439.25	35.9375	18.75	1323.06	1461.56	1504.95	1350.5	1899.71	1460.8	1616.45	1609.94	6.25	12.5	43.75	50	31.25	43.75	18.75	12.5
12	1	21	0	368.18	0	684	0	38	1462.7	10.1562	1640.69	1284.7	15.625	4.6875	1139.59	1622.19	1435.84	1551.07	1870.43	1674.9	1259.84	1158.56	6.25	0	31.25	12.5	12.5	12.5	6.25	0
13	1	20	0	277.2	0	925	1.59091	45	1459.08	10.9375	1602.81	1315.35	15.625	6.25	1115.62	1362.94	1413.72	1888.25	1579.64	1698.14	1521.18	1213.53	0	12.5	18.75	25	12.5	6.25	6.25	6.25
14	0	24	0	296.53	0	782	0.681818	41	1458.97	13.2812	1510.33	1407.61	14.0625	12.5	1265.38	1390	1477.06	1575.79	1651.15	1642.91	1408.07	1313.62	0	18.75	12.5	6.25	18.75	25	25	0
15	0	21	0	295.8	0	533	0.454545	54	1432.43	20.3125	1558.53	1306.33	20.3125	20.3125	1293.94	1442.33	1465.03	1330.21	1519.23	1641.64	1472.71	1350.69	6.25	25	50	25	12.5	12.5	12.5	18.75
16	0	19	0	#	#	809	1.59091	40	1395.73	15.625	1432.14	1359.32	20.3125	10.9375	1243.48	1219.11	1422.77	1349.43	1677.98	1520.35	1495.85	1372.44	12.5	6.25	18.75	12.5	31.25	31.25	12.5	0
17	0	19	0	349.27	0	491	0.454545	48	1382.99	24.2188	1455.96	1310.02	28.125	20.3125	1033.31	1327.63	1259.7	1754.62	1525	1590.03	1417.9	1359.34	12.5	25	31.25	37.5	31.25	43.75	6.25	6.25
18	1	19	0	297.23	0	838	0.227273	47	1328.72	18.75	1419.58	1237.86	25	12.5	1109.16	1339.12	1465.96	1558.62	1389.25	1450.81	1280.25	1180.7	6.25	6.25	37.5	31.25	25	18.75	18.75	6.25
19	1	22	0	339.13	0	712	0.909091	45	1327.05	19.5312	1324.2	1329.89	23.4375	15.625	1153.06	1236.96	1319.11	1426.3	1486.75	1453.48	1351.43	1225.67	0	25	18.75	31.25	25	12.5	31.25	12.5
20	0	21	0	311.53	0	550	0.454545	52	1323.73	17.1875	1459.71	1187.76	25	9.375	1046.21	1128.65	1283.26	1501.4	1480.67	1757.83	1463.44	1071.12	6.25	18.75	6.25	37.5	50	18.75	0	0
21	0	22	0	312.78	0	533	0	51	1282.34	9.375	1381.26	1183.43	9.375	9.375	1202.5	1397.31	1147.79	1564.25	1440.86	1221.87	1146.93	1144.69	0	0	12.5	18.75	12.5	25	6.25	0
22	1	21	0	#	#	935	2.04545	46	1254.71	19.5312	1247.92	1261.51	21.875	17.1875	1058.75	1104.29	1210.42	1249.83	1401.31	1494.5	1328.25	1251.69	0	12.5	37.5	31.25	25	50	0	0
23	1	19	0	#	#	746	2.5	38	1231.29	8.59375	1277	1185.58	14.0625	3.125	922.375	1080.92	1354.04	1367.16	1487.29	1212.39	1358.43	1080.38	0	6.25	6.25	18.75	6.25	18.75	12.5	0
24	1	20	0	#	#	754	0.454545	52	1220.35	11.7188	1300.95	1139.75	10.9375	12.5	1139.75	1012.19	1137.25	1435.6	1446.36	1195.75	1370.38	1072.77	0	0	25	31.25	18.75	0	12.5	6.25
25	0	20	0	#	#	859	1.13636	40	1211.35	25	1274.78	1147.92	28.125	21.875	1153.59	1194.52	1100.5	1203.65	1294.75	1242.83	1379	1107.46	18.75	6.25	43.75	43.75	25	25	25	12.5
26	1	18	0	329.37	0	671	0	50	1202.45	12.5	1300.07	1104.83	15.625	9.375	1032.31	1222.08	1274.84	1399.69	1194.08	1048.81	1208.38	1184.19	0	6.25	18.75	12.5	18.75	37.5	6.25	0
27	0	22	0	282.72	0	844	0.681818	50	1177.39	17.1875	1224.04	1130.74	23.4375	10.9375	1044.69	1078.86	1537.82	1166.37	1166.33	1236.19	1250.12	1040.54	0	12.5	31.25	25	25	18.75	18.75	6.25
28	1	20	0	#	#	603	0.227273	42	1153.94	14.0625	1230.48	1077.4	18.75	9.375	1157.5	1076.01	1058.62	1337.45	1305.5	1232.36	1163.55	980.312	0	6.25	18.75	31.25	25	25	6.25	0
29	0	20	0	#	#	570	0.681818	51	1115.55	18.75	1189.54	1041.55	25	12.5	879.938	991.312	1096.04	1395.5	1268.22	1233.71	1153.17	1117.94	0	0	37.5	43.75	31.25	12.5	25	0
30	1	21	0	306.52	0	922	0.681818	47	1115.17	22.6562	1160.05	1070.29	32.8125	12.5	1047.52	1142.19	1288.52	1135.94	1246.33	1039.08	1078.67	1029.49	6.25	12.5	37.5	25	43.75	37.5	12.5	6.25
31	1	20	0	332.93	0	620	0.227273	38	1110.08	16.4062	1203.71	1016.46	25	7.8125	1023.96	995.562	1024.67	1323.75	1201.08	1071.25	1256.38	1026.8	6.25	12.5	18.75	25	25	18.75	18.75	6.25
32	0	24	0	324.22	0	648	0.454545	42	1072.19	13.2812	1144.32	1000.05	17.1875	9.375	883.759	1009.73	1138.57	1352.08	1087.58	1108.79	1134.56	961.938	6.25	6.25	18.75	25	25	12.5	12.5	0
33	0	19	0	309.92	0	808	0.454545	46	1065.27	25.7812	1154.23	976.314	31.25	20.3125	945.625	1032.71	1020.36	1144.95	1133.85	1218.64	1073.93	1063.12	0	12.5	37.5	43.75	43.75	50	12.5	6.25
34	0	20	0	#	#	473	0.227273	41	1058.88	12.5	1118.54	999.232	12.5	12.5	966.795	1106.6	1033.37	1196.92	1022.48	1087.88	1132.28	985.062	6.25	6.25	6.25	25	18.75	31.25	6.25	0
35	1	21	0	346.73	0	1065	0	50	1040.48	17.1875	1144.3	936.65	28.125	6.25	783.107	1060.95	1207.68	1138.01	895.867	1253.44	1185.81	900.812	6.25	6.25	18.75	25	31.25	25	25	0
36	1	19	0	#	#	677	0.227273	54	1017.29	15.625	1004.87	1029.71	18.75	12.5	861.375	914.143	1138.79	1100.71	1192.89	1041.55	951.438	966.44	0	12.5	12.5	25	18.75	18.75	18.75	18.75
37	1	20	0	294.02	0	610	2.04545	42	1011.8	21.875	1030.22	993.389	28.125	15.625	1038.19	1050.34	1112.2	1028.7	900.3	1025.7	925.875	1005.8	0	6.25	25	37.5	31.25	37.5	31.25	6.25
38	1	22	0	280.22	0	800	0.909091	44	1009.97	10.9375	1100.11	919.831	14.0625	7.8125	800.848	1017.12	1059.06	1095.4	1041.56	1042.39	1088.35	959.893	6.25	0	0	25	25	18.75	6.25	6.25
39	0	18	0	411.05	0	458	0	53	1005.36	23.4375	1025.72	985	26.5625	20.3125	848.223	1012.77	1108.28	1161.1	867.417	1150.17	853.829	1107.56	6.25	12.5	31.25	37.5	43.75	25	25	6.25
40	1	25	0	304.8	0	992	2.27273	30	979.715	10.9375	1022.46	936.966	12.5	9.375	821.884	920.295	995.896	1215.26	936.812	1102.97	980.455	885.125	6.25	6.25	12.5	6.25	25	25	6.25	0
41	1	19	0	309.38	0	690	1.59091	35	976.879	14.8438	1083.27	870.483	20.3125	9.375	886.75	911.562	1021.83	939.25	1081.93	918.7	1134.62	910.438	0	12.5	18.75	37.5	18.75	18.75	0	12.5
42	0	20	0	423.52	0	491	0.227273	45	965.778	15.625	992.537	939.019	15.625	15.625	756.759	921.018	959.274	1100.83	896.283	1166.75	1062.73	913.312	6.25	6.25	18.75	25	31.25	25	12.5	0
43	0	23	0	313.25	0	896	1.13636	38	951.995	24.2188	981.674	922.315	32.8125	15.625	913.464	1041.34	996.086	944.5	921.625	904.167	969	940.83	6.25	25	25	31.25	31.25	25	43.75	6.25
44	0	22	0	311.13	0	624	1.13636	36	942.412	22.6562	1016.31	868.517	39.0625	6.25	795.15	866.188	966.5	1028.66	985.688	1020.75	1080.9	888.723	18.75	12.5	25	25	25	37.5	31.25	6.25
45	1	18	0	337.57	0	705	0	43	929.799	13.2812	1001.47	858.125	14.0625	12.5	786.062	885.295	962.875	989.333	1021.73	980.6	963.188	907.125	0	6.25	12.5	18.75	18.75	37.5	12.5	0
46	0	21	0	#	#	1052	1.81818	34	925.038	19.5312	937.604	912.473	25	14.0625	870.188	990.405	915.386	950	935.883	938.054	954.875	894.188	0	18.75	25	37.5	31.25	31.25	12.5	0
47	0	24	0	283.8	0	590	0.681818	49	919.991	18.75	972.326	867.655	28.125	9.375	769.25	825.9	980.542	1028.67	1140.6	901	1043.06	799.375	0	18.75	12.5	18.75	37.5	37.5	25	0
48	1	20	0	319.52	0	743	0	39	919.897	11.7188	1014.57	825.22	15.625	7.8125	822	863.116	991.292	993.414	981.25	946.643	971.786	827.75	0	6.25	12.5	25	18.75	18.75	12.5	0
49	1	20	0	307.55	0	803	1.36364	54	882.672	22.6562	920.956	844.389	29.6875	15.625	749.58	857.625	874	1062.58	997.725	833.8	859.833	900.312	6.25	18.75	50	12.5	43.75	37.5	12.5	0
50	1	20	0	#	#	708	1.59091	37	875.146	32.0312	883.675	866.617	37.5	26.5625	838.312	849	1104.8	797.875	806.625	858.167	1003.36	732.167	12.5	31.25	37.5	62.5	31.25	37.5	25	18.75
51	0	20	0	278.6	0	519	0.227273	50	864.321	29.6875	872.927	855.714	35.9375	23.4375	810.839	929.325	843.283	908.167	973.913	756.467	787.25	862.134	6.25	43.75	31.25	43.75	18.75	50	37.5	6.25
52	1	21	0	277.6	0	488	0.227273	48	864.043	16.4062	895.152	832.934	28.125	4.6875	808.866	786.188	856.479	951.714	943.696	828.714	834.657	859.179	6.25	18.75	12.5	12.5	6.25	43.75	25	6.25
53	0	19	0	344.97	0	794	3.18182	46	847.327	24.2188	897.295	797.358	31.25	17.1875	739.143	851.69	866.167	961.4	835.667	854.571	881.917	794.062	6.25	18.75	18.75	43.75	43.75	37.5	25	0
54	1	20	0	#	#	755	0.454545	49	846.337	19.5312	818.191	874.482	26.5625	12.5	800.375	844.462	796.411	910.45	917.714	900.429	936.614	728.938	0	18.75	31.25	43.75	12.5	25	25	0
55	0	19	0	296.43	0	473	0	54	830.14	16.4062	877.229	783.051	25	7.8125	741.018	727.5	833	872	901.75	880.763	914.768	766.688	6.25	25	12.5	37.5	25	18.75	6.25	0
56	1	19	0	#	#	577	0.681818	47	824.297	21.0938	893.111	755.482	29.6875	12.5	705	769.062	898.143	915.083	896.883	776.086	960.671	728.312	0	12.5	31.25	31.25	31.25	25	25	12.5
57	1	21	0	337.93	0	576	0.454545	50	822.238	26.5625	816.542	827.935	25	28.125	809.688	867.5	876.85	816.812	797.667	875.5	803.167	780.071	0	31.25	31.25	25	37.5	50	25	12.5
58	1	20	0	285.12	0	584	1.36364	40	817.612	20.3125	866.82	768.404	21.875	18.75	743.188	814.107	824.854	861.417	829.333	880.314	857.298	755.536	0	6.25	12.5	37.5	43.75	25	18.75	18.75
59	0	20	0	#	#	715	0.454545	40	785.203	24.2188	859.814	710.593	32.8125	15.625	733.042	750.196	807	859.833	824.3	1000.85	769.7	732.688	12.5	6.25	25	43.75	25	56.25	25	0
60	0	19	0	303.97	0	817	0.681818	44	783.927	32.8125	790.486	777.367	42.1875	23.4375	709.021	718.5	918.792	838.867	805.833	802.458	769.381	779.086	12.5	37.5	37.5	31.25	25	56.25	37.5	25
61	0	22	0	297.05	0	672	0	44	743.253	32.0312	748.923	737.583	39.0625	25	799.75	698.393	813.414	752.5	735.875	830.467	698.274	656.788	25	18.75	25	62.5	56.25	31.25	18.75	18.75
62	0	19	0	346.43	0	617	0.227273	47	721.484	22.6562	748.478	694.491	28.125	17.1875	640.25	791.286	726.917	699.7	678.3	828.714	718.277	702.545	12.5	18.75	43.75	37.5	43.75	12.5	6.25	6.25
63	1	22	0	268.97	0	674	0	51	693.897	24.2188	705.349	682.444	32.8125	15.625	668.062	668	660.479	698.033	746.343	667.075	765.833	673.643	0	25	31.25	31.25	25	43.75	25	12.5
64	1	21	0	312.35	0	490	0	55	689.183	20.3125	708.652	669.714	28.125	12.5	660.562	692.214	677.737	762.357	707.196	648.196	726.125	681.589	0	12.5	18.75	25	31.25	31.25	37.5	6.25
65	1	22	0	285.78	0	752	1.13636	50	685.11	23.4375	703.064	667.157	26.5625	20.3125	652.732	661.288	702.333	689.167	709.2	744.5	697.438	661.188	6.25	18.75	25	37.5	37.5	37.5	25	0
66	0	20	0	#	#	553	0.681818	48	656.115	24.2188	690.231	622	39.0625	9.375	602	674.438	677.536	730.6	630.146	764.867	674.6	580.08	0	25	31.25	31.25	31.25	50	18.75	6.25
67	0	20	0	326.62	0	624	0	52	617.882	33.5938	630.195	605.568	35.9375	31.25	601.417	626.083	574.625	692.3	688.4	635.542	559.371	580.75	25	31.25	50	37.5	37.5	37.5	25	25
68	0	21	0	291.78	0	530	1.36364	45	570.387	22.6562	583.717	557.057	28.125	17.1875	552	567.671	565.7	582.625	571.6	588.45	609.583	538.375	12.5	25	31.25	37.5	31.25	31.25	12.5	0
69	1	20	0	286.85	0	686	0.909091	49	562.962	30.4688	593.528	532.396	43.75	17.1875	534.812	532.667	655.938	548.733	632.333	533.667	574.288	543.929	18.75	37.5	25	50	43.75	37.5	18.75	12.5
70	0	22	0	299.4	0	567	0.227273	45	432.795	34.375	432.743	432.848	42.1875	26.5625	427.25	387.814	379.575	393.275	485.117	390.208	526.167	470.9	18.75	25	37.5	43.75	31.25	56.25	37.5	25
71	1	22	1	332.87	0	508	0.227273	51	1616.24	16.4062	1705.68	1526.8	26.5625	6.25	1312.12	1626.6	1668.4	1633.12	1934.3	1802.3	1653.42	1480.33	0	12.5	12.5	12.5	43.75	18.75	18.75	12.5
72	0	19	1	300.02	0	488	0.454545	41	1577.76	10.1562	1725	1430.52	14.0625	6.25	1127	1645.5	1827.54	1871.84	1793.46	1921.5	1513.88	1182.94	0	6.25	18.75	25	18.75	12.5	0	0
73	0	21	1	403.23	0	524	0.227273	34	1573.7	18.75	1719.57	1427.84	23.4375	14.0625	1516.23	1788.88	1453.58	1777.73	1606.83	1685.44	1672.49	1245.19	12.5	12.5	12.5	31.25	37.5	25	18.75	0
74	1	19	1	#	#	350	0.454545	43	1466.02	19.5312	1553.65	1378.4	25	14.0625	1261.31	1394.75	1667.44	1441.42	1560.48	1689.85	1585.87	1256.9	0	0	25	25	31.25	31.25	18.75	25
75	1	20	1	345.85	0	580	2.04545	35	1408.06	25	1574.21	1241.91	32.8125	17.1875	1144.5	1245.38	1607.17	1461.46	1658.7	1722.12	1432.45	1177.08	25	6.25	31.25	37.5	31.25	43.75	18.75	6.25
76	1	20	1	352.37	0	362	0	47	1406.43	13.2812	1429.83	1383.03	18.75	7.8125	1250.96	1361.29	1283.38	2014	1292.47	1587.37	1269.18	1309.19	6.25	6.25	12.5	18.75	31.25	18.75	6.25	6.25
77	1	22	1	298.1	0	427	0	51	1376.34	14.0625	1455.95	1296.73	14.0625	14.0625	1043.56	1391	1335.36	1471.21	1583.17	1444.71	1554.27	1307.77	0	0	12.5	37.5	25	12.5	18.75	6.25
78	1	19	1	#	#	526	0.227273	55	1375.79	15.625	1437.82	1313.76	21.875	9.375	1105.19	1479	1382.51	1558.8	1382.5	1527.46	1426.25	1264.23	0	12.5	18.75	37.5	12.5	18.75	12.5	12.5
79	0	21	1	333.87	0	631	0.681818	41	1375.53	17.9688	1587.16	1163.91	21.875	14.0625	1070.63	1348.79	1600.64	1537.67	1327.61	1683.5	1360.21	1255.79	6.25	12.5	12.5	25	25	43.75	6.25	12.5
80	0	22	1	380.5	0	552	1.13636	49	1372.02	14.0625	1509.65	1234.38	18.75	9.375	862.714	1254.06	1563	1807.82	1213.37	1527.71	1600.77	1306.49	6.25	0	18.75	31.25	25	12.5	12.5	6.25
81	1	19	1	343.82	0	633	0.909091	31	1341.34	23.4375	1437.91	1244.76	32.8125	14.0625	1074.74	1333.33	1425.47	1458.38	1234.75	1415.96	1560.2	1272.14	6.25	12.5	25	37.5	56.25	18.75	18.75	12.5
82	0	20	1	393.18	0	609	0.681818	44	1327.79	25	1401.82	1253.76	29.6875	20.3125	1224.49	1289.7	1348.06	1477.62	1419.99	1351.6	1312.88	1311.54	6.25	31.25	25	37.5	18.75	37.5	18.75	25
83	1	21	1	#	#	507	0.454545	47	1273.5	10.1562	1329.79	1217.22	12.5	7.8125	1058.19	1346.56	1403.27	1355.96	1476.34	1324.05	1204.46	1195.12	0	6.25	12.5	6.25	31.25	18.75	6.25	0
84	0	21	1	368.23	0	438	0	35	1268.67	16.4062	1347.33	1190	25	7.8125	1120.78	1210.22	1185.9	1373.71	1424.65	1229.33	1354.57	1325.66	6.25	6.25	12.5	37.5	18.75	25	6.25	18.75
85	1	19	1	304.83	0	668	0.909091	45	1216.27	13.2812	1313.89	1118.65	15.625	10.9375	1077.44	1128.29	1347.19	1290.53	1191.82	1178.35	1354.96	1189.08	0	6.25	12.5	31.25	18.75	18.75	12.5	6.25
86	0	19	1	313.55	0	455	0.227273	46	1209.63	19.5312	1271.16	1148.1	20.3125	18.75	924.688	1153.79	1192.83	1457.36	1291.08	1434.4	1337.06	977	12.5	12.5	18.75	12.5	37.5	31.25	25	6.25
87	1	21	1	#	#	471	1.36364	48	1190.02	17.1875	1286.58	1093.46	21.875	12.5	1028.84	1087.6	1376.81	1120.97	1469.93	1254.9	1144.81	1073.25	6.25	6.25	18.75	50	18.75	37.5	0	0
88	1	21	1	350.63	0	483	0.227273	45	1122.63	13.2812	1205.87	1039.39	18.75	7.8125	1022.5	1173.69	1149.33	1235.68	1009.32	1158.31	1191.25	1055.5	0	12.5	18.75	6.25	18.75	18.75	25	6.25
89	0	23	1	337.48	0	500	0.681818	43	1120.04	16.4062	1141.19	1098.9	25	7.8125	1121.19	1109.92	1212	1147.07	1233.66	1138.8	1120.42	899.375	0	6.25	31.25	31.25	25	18.75	18.75	0
90	1	21	1	#	#	508	0.681818	44	1105.68	13.2812	1187.3	1024.07	21.875	4.6875	1065.19	1044.34	1166.1	1271.44	1092.99	1129.3	1068.27	991.304	0	18.75	12.5	18.75	18.75	18.75	12.5	6.25
91	0	21	1	#	#	456	0	47	1096.73	9.375	1222.63	970.831	10.9375	7.8125	1226	1058.46	1069.18	1227.71	1346.41	1197.98	932.312	855.562	0	6.25	6.25	31.25	6.25	18.75	6.25	0
92	1	18	1	359.28	0	496	1.13636	49	1086.17	20.3125	1129.27	1043.07	25	15.625	1032.48	911.812	1180.07	1075.12	1096.71	1233.84	1178.64	1029.4	6.25	0	37.5	50	6.25	31.25	12.5	18.75
93	0	23	1	326.23	0	439	0.227273	44	1040.53	18.75	1069.95	1011.12	14.0625	23.4375	951.964	1001.79	1060.29	1089.83	1075.25	997.729	1045.6	1047.44	6.25	12.5	12.5	18.75	25	31.25	43.75	0
94	1	20	1	342.02	0	505	0.681818	43	1040.33	24.2188	1048.09	1032.57	32.8125	15.625	935.42	1049.19	1072.45	1115.8	1160.08	1060.32	1009	1025.5	6.25	12.5	31.25	37.5	43.75	31.25	31.25	0
95	1	24	1	313.63	0	507	1.36364	46	1023.3	16.4062	1117.69	928.914	23.4375	9.375	800.125	941.625	1040.07	1262.5	1147.67	1163.59	1022.5	890.009	0	12.5	31.25	31.25	18.75	18.75	12.5	6.25
96	0	21	1	383.3	0	373	1.36364	52	992.373	14.0625	1040.8	943.951	23.4375	4.6875	881.312	924.438	1047.5	1042.25	1058.67	961.587	1087.14	971.643	0	6.25	25	25	25	18.75	6.25	6.25
97	0	19	1	349.87	0	303	0.227273	56	980.904	16.4062	1015.6	946.204	17.1875	15.625	862.143	1011.16	944.929	1020.48	976.946	1177.02	1031.06	894.83	6.25	6.25	18.75	18.75	31.25	31.25	12.5	6.25
98	0	22	1	#	#	524	1.36364	47	966.438	21.0938	922.239	1010.64	28.125	14.0625	1013.1	1009.48	926.45	1031.54	901.7	1142.33	1001.51	760.902	18.75	18.75	18.75	18.75	43.75	25	18.75	6.25
99	0	20	1	443.58	1.66	405	0	43	964.697	26.5625	974.103	955.291	39.0625	14.0625	937.438	979.482	1097.93	909.643	961.867	1113.95	759.702	1045.12	0	6.25	43.75	31.25	50	43.75	18.75	18.75
100	0	21	1	276.22	0	426	0.227273	48	956.318	7.8125	1028.1	884.533	9.375	6.25	834.812	916.5	1001.99	951.643	985.345	1023.4	1158.93	803.75	0	0	6.25	18.75	18.75	12.5	6.25	0
101	0	19	1	#	#	357	0.454545	45	942.924	23.4375	933.721	952.127	32.8125	14.0625	846.634	846.825	999.393	1020.46	990.339	1025.46	1095.99	834.812	6.25	18.75	31.25	56.25	31.25	37.5	6.25	0
102	0	20	1	370.37	0	600	1.36364	38	933.18	14.8438	999.98	866.379	20.3125	9.375	900.67	776.763	897.45	1012.36	1075.57	972.536	1047.64	793.5	6.25	18.75	31.25	12.5	25	18.75	6.25	0
103	1	19	1	386.45	0	591	0	48	916.223	19.5312	955.216	877.231	20.3125	18.75	801.75	917.214	915.333	993.274	967.958	894.757	918.345	931.304	0	6.25	25	18.75	56.25	25	18.75	6.25
104	0	21	1	#	#	440	0.227273	41	911.975	19.5312	948.1	875.849	21.875	17.1875	801.089	925.125	892.275	964.875	1029.5	965.75	875.067	855.631	6.25	6.25	18.75	31.25	18.75	25	31.25	18.75
105	0	19	1	#	#	476	0.909091	42	910.32	25.7812	920.95	899.691	37.5	14.0625	851.896	852.857	877.405	978.2	934.857	801.333	907.429	942.893	12.5	25	37.5	31.25	31.25	50	12.5	6.25
106	0	21	1	#	#	440	0.227273	43	896.047	19.5312	908.612	883.481	23.4375	15.625	943.612	909.821	763	891.717	1033.25	908.786	985.732	761.06	18.75	6.25	25	31.25	25	25	6.25	18.75
107	1	21	1	318.23	0	499	0.681818	34	892.866	18.75	931.125	854.607	25	12.5	814.833	924.475	947.869	844.333	869.548	937.988	878.543	927.402	12.5	18.75	18.75	31.25	18.75	18.75	25	6.25
108	0	21	1	#	#	372	0	54	888.649	18.75	889.333	887.964	25	12.5	829.062	882.726	904.979	988.529	913.833	885.086	827.94	878.312	6.25	18.75	12.5	25	43.75	25	18.75	0
109	0	20	1	326.87	0	464	0	52	882.752	20.3125	911.717	853.786	28.125	12.5	809.938	866.6	926.208	929.814	841.85	1048.74	840.991	806.098	6.25	25	37.5	25	31.25	25	6.25	6.25
110	0	20	1	#	#	515	0.681818	52	872.202	17.9688	913.489	830.914	26.5625	9.375	866.643	787.55	817.743	855.75	941.443	881.988	940.4	888.938	6.25	18.75	25	31.25	25	18.75	18.75	0
111	1	23	1	313.2	0	397	1.59091	42	846.769	17.9688	909.292	784.246	25	10.9375	795	779.938	914.476	859.625	951.125	907.786	801.312	776.5	6.25	25	18.75	37.5	43.75	6.25	0	6.25
112	0	21	1	324.68	0	455	0.454545	43	820.081	21.875	861.489	778.673	29.6875	14.0625	710.875	843.471	871.157	869.471	815.232	829.133	842.5	809.65	6.25	25	25	25	31.25	31.25	12.5	18.75
113	1	20	1	288.2	0	471	0.909091	46	807.765	25	810.068	805.462	31.25	18.75	753.259	795.339	800.325	865.8	859.4	845.417	865.643	706.25	6.25	6.25	43.75	37.5	37.5	25	25	18.75
114	0	22	1	346.52	0	575	0.681818	38	803.42	14.8438	844.821	762.019	12.5	17.1875	719.167	765.155	981.071	793.833	805.967	837.75	828.812	691.438	12.5	18.75	12.5	25	31.25	6.25	6.25	6.25
115	1	25	1	374.43	0	498	0.227273	42	793.288	27.3438	798.841	787.735	31.25	23.4375	733.607	811.75	844.125	812.214	768.483	835.5	846.393	721.19	18.75	25	37.5	12.5	31.25	43.75	31.25	18.75
116	0	21	1	#	#	421	0.227273	50	789.36	28.125	817.4	761.319	29.6875	26.5625	769.955	835.929	792.357	786.875	776.317	797.025	819.833	733.905	6.25	25	25	50	31.25	43.75	25	18.75
117	0	22	1	496.62	0	460	0.454545	43	778.104	24.2188	824.468	731.74	26.5625	21.875	707.6	790.429	760.567	795.125	789.229	825.798	702.405	866.25	18.75	12.5	31.25	56.25	25	18.75	18.75	12.5
118	1	24	1	379.1	0	397	0.454545	39	774.397	17.9688	828.812	719.982	25	10.9375	688.458	745.979	860.457	770	820.917	764.292	817.869	737.812	12.5	12.5	25	12.5	25	37.5	18.75	0
119	1	18	1	#	#	373	0	51	765.427	21.875	809.059	721.796	20.3125	23.4375	670.875	758.643	771.202	825.95	864.567	753.033	824.548	706.524	0	12.5	18.75	43.75	31.25	31.25	18.75	18.75
120	0	20	1	298.18	0	320	1.13636	50	759.876	25	782.581	737.17	32.8125	17.1875	581.987	704.714	837.971	1016	838.167	686.275	664.196	735.589	18.75	12.5	25	25	37.5	43.75	31.25	6.25
121	0	25	1	366.5	0	525	0.681818	49	732.48	20.3125	737.784	727.176	20.3125	20.3125	677.4	786.438	799.85	717.643	743.607	804.548	722.357	657.25	18.75	12.5	31.25	50	18.75	18.75	12.5	0
122	1	20	1	312.98	0	599	1.13636	49	713.931	21.875	741.787	686.075	26.5625	17.1875	689.062	693.167	750.062	751.083	762.286	761.083	708.393	636.821	0	25	12.5	43.75	18.75	37.5	31.25	6.25
123	0	21	1	#	#	354	0	52	709.537	17.9688	743.021	676.052	26.5625	9.375	651	657.833	737.75	753.292	731.583	813	667.775	678.598	0	12.5	25	37.5	18.75	25	18.75	6.25
124	0	25	1	302.9	0	512	0.227273	45	701.68	27.3438	722.089	681.271	29.6875	25	690.062	716.476	720.417	667.083	747.625	732.867	694.55	636.381	6.25	18.75	43.75	43.75	6.25	50	31.25	18.75
125	1	21	1	454.52	0	438	0.909091	38	694.692	14.8438	709.745	679.638	20.3125	9.375	638.625	648.857	710.476	726.396	698.762	765.292	670.741	719.804	6.25	18.75	37.5	12.5	18.75	12.5	6.25	6.25
126	0	19	1	304.38	0	569	0.227273	50	689.381	28.9062	757.897	620.865	39.0625	18.75	667.854	610.188	687.829	698.833	702.8	702.517	712.25	705.616	31.25	18.75	25	50	43.75	31.25	25	6.25
127	1	20	1	301.67	0	395	0.681818	53	680.89	19.5312	689.173	672.608	18.75	20.3125	673.562	606.837	675.125	758.25	703.8	721.94	685.976	672.321	0	18.75	12.5	50	31.25	18.75	18.75	6.25
128	0	20	1	336.3	0	469	1.36364	40	675.164	16.4062	685	665.328	23.4375	9.375	640.688	661.271	648.729	695.35	689.202	669.488	700.708	684.536	0	31.25	12.5	31.25	18.75	18.75	12.5	6.25
129	1	19	1	334.05	0	785	1.36364	51	650.23	23.4375	696.023	604.436	32.8125	14.0625	624.188	621.625	661.929	736.875	699.208	660.229	648.232	606.438	12.5	12.5	25	43.75	37.5	25	31.25	0
130	1	19	1	320.02	0	412	1.36364	44	643.003	20.3125	660.787	625.218	26.5625	14.0625	660.938	621.214	660.929	640.036	637.5	660	599.857	647.125	0	18.75	25	18.75	37.5	25	25	12.5
131	1	19	1	#	#	391	0	44	629.06	17.9688	628.245	629.875	23.4375	12.5	605.214	618.286	636.152	624.483	633.675	658.655	657.104	597.771	6.25	12.5	6.25	31.25	43.75	18.75	12.5	12.5
132	1	20	1	325.62	0	449	0	46	615.307	13.2812	642.648	587.965	15.625	10.9375	612.438	619.098	651.375	625.225	597.017	614.871	598.312	613.188	0	6.25	12.5	18.75	31.25	25	12.5	0
133	0	23	1	333.28	0	567	0.681818	53	594.523	23.4375	598.178	590.868	29.6875	17.1875	552.902	542.857	631.65	699.214	595.107	585.9	567.018	610.812	6.25	25	31.25	25	18.75	37.5	31.25	12.5
134	1	20	1	301.15	0	631	1.13636	50	588.921	30.4688	619.933	557.909	29.6875	31.25	566.631	550.067	603.333	610.5	612.583	602.875	613.083	570	18.75	31.25	25	37.5	31.25	50	31.25	18.75
135	1	21	1	#	#	500	0	46	562.714	26.5625	570.929	554.5	34.375	18.75	566.604	566.917	560.983	563.35	579.7	607.657	552.2	510.863	12.5	12.5	31.25	43.75	37.5	25	31.25	18.75
136	1	21	1	#	#	402	1.13636	41	553.259	28.9062	552.762	553.755	34.375	23.4375	577.775	584.788	545.883	526.875	506.275	546.125	532.857	580.438	18.75	18.75	31.25	43.75	43.75	43.75	18.75	12.5
137	1	21	1	#	#	434	0.909091	42	551.469	27.3438	559.9	543.038	37.5	17.1875	554.357	551.446	523.292	590.15	645.5	563.329	542.175	504.708	12.5	6.25	37.5	43.75	62.5	25	18.75	12.5
138	0	21	1	307.98	0	325	0.227273	46	539.132	36.7188	574.439	503.825	35.9375	37.5	533.167	470.629	461.917	665.417	522.833	561	587.3	499.048	25	25	37.5	43.75	56.25	50	37.5	18.75
139	1	22	1	326.4	0	386	0.909091	45	524.974	21.875	533.872	516.075	26.5625	17.1875	518.042	557.958	511	498.05	564.417	499.771	547.129	489.19	12.5	12.5	18.75	31.25	31.25	25	25	18.75
140	0	23	1	278.9	0	428	1.13636	49	515.501	25.7812	519.317	511.685	35.9375	15.625	482.113	543.171	503.6	494.893	526.333	501.083	518.917	554.083	18.75	25	37.5	31.25	37.5	12.5	12.5	31.25
